## A multi-parent advanced generation inter-cross population for genetic analysis of multiple traits in cowpea (*Vigna unguiculata* L. Walp.)

Bao-Lam Huynh<sup>1\*</sup>, Jeffrey D. Ehlers<sup>2,3</sup>, Maria Munoz-Amatriain<sup>3</sup>, Stefano Lonardi<sup>4</sup>, Jansen R. P. Santos<sup>1</sup>, Arsenio Ndeve<sup>1</sup>, Benoit J. Batiemo<sup>5</sup>, Ousmane Boukar<sup>6</sup>, Ndiaga Cisse<sup>7</sup>, Issa Drabo<sup>8</sup>, Christian Fatokun<sup>9</sup>, Francis Kusi<sup>10</sup>, Richard Y. Agyare<sup>10</sup>, Yi-Ning Guo<sup>3</sup>, Ira Herniter<sup>3</sup>, Sassoum Lo<sup>3</sup>, Steve I. Wanamaker<sup>3</sup>, Timothy J. Close<sup>3</sup> and Philip A. Roberts<sup>1\*</sup>

<sup>1</sup>Department of Nematology, University of California, Riverside, CA, USA

<sup>2</sup>Present address, Bill and Melinda Gates Foundation, Seattle, WA, USA

<sup>3</sup>Department of Botany and Plant Sciences, University of California, Riverside, CA, USA

<sup>4</sup>Department of Computer Science and Engineering, University of California, Riverside, CA, USA

<sup>5</sup>Institut de l'Environnement et de Recherches Agricoles, Kamboinse, Burkina Faso

<sup>6</sup>International Institute of Tropical Agriculture, Kano, Nigeria

<sup>7</sup>Institut Senegalais de Recherches Agricoles, Thies, Senegal

<sup>8</sup>Institut de l'Environnement et de Recherches Agricoles, Koudougou, Burkina Faso (deceased)

<sup>9</sup>International Institute of Tropical Agriculture, Ibadan, Nigeria

<sup>10</sup>Council for Scientific and Industrial Research, Savanna Agricultural Research Institute, Tamale, Ghana

\*Corresponding authors:

Bao-Lam Huynh: baolam.huynh@ucr.edu; phone: +1-951-827-7330; Fax: +1-951-827-3719

Philip A. Roberts: philip.roberts@ucr.edu; phone: +1-951-827-7332; Fax: +1-951-827-3719

### Abstract

Development and analysis of Multiparent Advanced Generation Inter-Cross (MAGIC) populations have been conducted with several crop plants to harness the potential for dissecting the genetic structure of traits and improving breeding populations. We developed a first MAGIC population for cowpea (*Vigna unguiculata* L. Walp.) from eight founder parents which are genetically diverse and carry many abiotic and biotic stress resistance, seed quality and agronomic traits relevant to cowpea improvement in sub-Saharan Africa (SSA) where cowpea is vitally important in the human diet and in local economies. The eight parents were inter-crossed using structured matings to ensure the population would have balanced representation from each of the founder parents, followed by single-seed descent, resulting in 365 F8 recombinant inbred lines (RILs) each carrying a mosaic of genome blocks contributed from all founders. This was confirmed by SNP genotyping with the cowpea Illumina 60K iSelect BeadArray. Following filtering to eliminate duplicates, sister lines and accidental selfing events, a core set of 305 F8 RILs was chosen as the primary population. The F8 lines were on average 99.74% homozygous while also diverse in agronomic traits including flowering time, growth habit, maturity, yield potential and seed characteristics across environments. Trait-associated SNPs were identified for most of the parental traits. Loci with major effects on photoperiod sensitivity and seed size were also verified by genetic mapping in biparental RIL populations. The distribution of recombination frequency varied considerably between chromosomes, with recombination hotspots distributed mostly in the telomeric regions. Due to its broad genetic base, this cowpea MAGIC population promises breakthroughs in genetic gain and high-resolution genetic mapping for gene discovery, enhancement of breeding populations and, for some lines, direct releases as new varieties.

47 **Key words**

48 Association Mapping; Multiparental Populations; MPP; Quantitative Trait Locus; Recombination;  
49 Photoperiod; Flowering Time; Seed Size; Legumes

50

51 **Introduction**

52 Cowpea (*Vigna unguiculata* L. Walp) is a highly nutritious warm-season grain legume crop vitally  
53 important for food security in Africa where it provides a primary source of protein that  
54 complements cereals in the diet (EHLERS and HALL 1997; KUDRE *et al.* 2013) and fodder for  
55 livestock. However, in the Sudano-Sahel region of West Africa typical smallholder farmer cowpea  
56 grain yields are only 10-20 % of known yield potential (WIDDERS 2012). Biotic stresses caused by  
57 insect pests, and diseases caused by pathogens, the parasitic weed *Striga gesnerioides* and  
58 nematodes, and abiotic stresses from heat, drought and low-fertility soils are primary constraints  
59 to cowpea grain production. Many of these problems also affect cowpea production in parts of  
60 southern Europe, Asia, Australia, Latin America, and southern United States (EHLERS and HALL  
61 1997; HUYNH *et al.* 2013a). Development of cowpea cultivars that tolerate or resist these  
62 constraints will increase yield and reduce costly chemical based crop-protection inputs and  
63 promote human and environmental health, thus directly benefitting resource-poor farmers.

64 The greatest opportunity to increase cowpea grain yields lies in the rich genetic variation within  
65 this diploid ( $2n = 22$ ) species as it has numerous resistance and tolerance traits to combat biotic  
66 and abiotic stresses (HUYNH *et al.* 2013b; MUCHERO *et al.* 2013). Many of these traits have been  
67 genetically mapped using QTL discovery and mapping approaches (OUÉDRAOGO *et al.* 2002b;  
68 MUCHERO *et al.* 2010; MUCHERO *et al.* 2011; LUCAS *et al.* 2012; OUÉDRAOGO *et al.* 2012;  
69 POTTORFF *et al.* 2012; POTTORFF *et al.* 2014; HUYNH *et al.* 2015; HUYNH *et al.* 2016). Cowpea has  
70 the capacity to produce grain under magnitudes of water stress that would render comparable crops  
71 unproductive (EWANSIHA and SINGH 2006), yet significant differences in drought tolerance exist  
72 among cowpea lines at different stages of growth (WATANABE *et al.* 1997; MAI-KODOMI *et al.*  
73 1999a). For example, there are significant phenotypic differences in ability to survive vegetative-  
74 stage drought stress (MAI-KODOMI *et al.* 1999b; MUCHERO *et al.* 2013), providing opportunity for  
75 cowpea breeders to incorporate early-season drought tolerance into improved varieties. Among  
76 genotypes exhibiting seedling drought tolerance, two types of responses were observed by Mai-  
77 Kodomi *et al.* (1999a). Type 1 response plants ceased all growth and conserved moisture in all  
78 plant tissues, thereby allowing subsequent recovery of the entire shoot upon re-hydration. In  
79 contrast, type 2 response involved plants mobilizing moisture from lower leaves to sustain growth  
80 of new trifoliates, with rapid senescence of unifoliates at the onset of water-stress conditions. Mid-  
81 and late-season drought stresses have received considerable attention, given their negative effects  
82 on yield parameters (HALL *et al.* 2003; PADI 2004; DADSON *et al.* 2005). On a physiological level,  
83 osmotic adjustment, carbon isotope discrimination, transpiration, assimilation rates, and stomatal  
84 conductance in cowpea have been studied in detail (HUSSAIN *et al.* 1999; ANYIA and HERZOG  
85 2004; ODOEMENA 2004). In many cases, however, results were inconclusive or no meaningful  
86 differentiation between genotypes was achieved. Morphological investigations have tended to  
87 focus on root-related parameters where genotypes were compared for rooting depth and relative  
88 root biomass (MATSUI and SINGH 2003; OGBONNAYA *et al.* 2003). Phenologically, flowering and  
89 maturation times have been investigated for drought escape-related strategies (GWATHMEY and  
90 HALL 1992). Early maturing varieties may be able to complete their reproductive cycle in time to  
91 escape late-season drought (GRANTZ and HALL 1982; EHLERS and HALL 1997), but these varieties

92 were sensitive to mid-season drought (THIAW *et al.* 1993). Early flowering coupled with the  
93 delayed leaf senescence trait, which later promotes survival during mid- and late-season drought,  
94 allowing plants to produce a second flush of pods, offers the greatest potential for managing both  
95 mid- and late-season drought conditions (GWATHMEY and HALL 1992). Association mapping  
96 identified multiple loci with pleiotropic effects on drought-related traits in cowpea across  
97 experiments in West Africa under limited water conditions (MUCHERO *et al.* 2013). Because  
98 drought tolerance is a complex trait, its genetic improvement combined with selection for biotic  
99 resistance would need a systematic breeding strategy involving multiple trait donors.

100 Development of multi-parent advanced generation intercross (MAGIC) populations, termed by  
101 Cavanagh *et al.* (2008), provides a state-of-the-art approach to advancing plant population  
102 resources for genetic analysis and breeding. It involves inter-mating multiple elite parents for  
103 several cycles followed by single-seed descent, resulting in recombinant inbred lines (RILs) each  
104 carrying a mosaic of genome blocks contributed from all founders. Development and analysis of  
105 MAGIC populations have been undertaken in a few crops including wheat, rice and chickpea due  
106 to the potential of this approach for dissecting genetic and genomic structure (HUANG *et al.* 2015).  
107 The goal of the current work was to develop an 8-parent MAGIC population for cowpea using  
108 founder parents that are highly diverse and carry many key traits relevant to cowpea production in  
109 SSA. In this paper, we report on the development, genetic analysis and validation of this new  
110 genetic resource using high-density marker genotyping platforms (MUCHERO *et al.* 2009a). Due to  
111 its broad genetic base, the cowpea MAGIC population provides opportunities for increasing  
112 genetic gain and QTL/gene discovery in cowpea and related species.

113

## 114 **Materials and Methods**

### 115 *Choice of parents*

116 The eight cowpea parents used in the original crosses were elite cultivars and breeding lines  
117 selected based on their high genetic diversity characterized by genotyping with 1,536 genome-  
118 wide gene-based SNP markers (MUCHERO *et al.* 2009a; MUÑOZ-AMATRIAÍN *et al.* 2017). In  
119 addition, they were chosen because collectively they carry multiple biotic and abiotic stress  
120 resistance and tolerance traits relevant to SSA (Table 1). SuVita 2, also known as ‘Gorom’, a local  
121 landrace in Burkina Faso, is resistant to the parasitic weed *Striga* (OUÉDRAOGO *et al.* 2002b) and  
122 the fungal pathogen *Macrophomina phaseolina* (MUCHERO *et al.* 2011). CB27, a California  
123 blackeye cultivar bred by University of California–Riverside (UCR) (EHLERS *et al.* 2000), is heat  
124 tolerant (LUCAS *et al.* 2013a) and highly resistant to root-knot nematodes (HUYNH *et al.* 2016),  
125 Fusarium wilt disease (POTTORFF *et al.* 2012; POTTORFF *et al.* 2014), and foliar thrips (LUCAS *et al.*  
126 *et al.* 2012). IT93K-503-1, a breeding line from the International Institute of Tropical Agriculture  
127 (IITA) breeding nursery in Nigeria, is drought tolerant (MUCHERO *et al.* 2009b), and resistant to  
128 root-knot nematodes (HUYNH *et al.* 2016), *M. phaseolina* (MUCHERO *et al.* 2011), and Fusarium  
129 wilt (POTTORFF *et al.* 2014). The other five parents (IT89KD-288, IT84S-2049, IT82E-18, IT00K-  
130 1263, and IT84S-2246) are also breeding lines from IITA, Nigeria; they also carry combinations  
131 of key traits including grain quality and resistance to root-knot nematode, *Striga*, Fusarium,  
132 viruses, and bacterial blight (Table 1).

133 **Table 1.** MAGIC founder parents and their traits relevant to SSA and other production areas

| Name        | Source <sup>a</sup> | Agronomic trait                                                                                                              | Resistance or tolerance trait                                                        |
|-------------|---------------------|------------------------------------------------------------------------------------------------------------------------------|--------------------------------------------------------------------------------------|
| SuVita 2    | INERA               | High yielding under drought in Senegal, Burkina Faso and Mozambique; large dark-brown seed                                   | Drought tolerant, resistant to Striga, foliar thrips and <i>Macrophomina</i> disease |
| CB27        | UCR                 | High yielding under drought in Mozambique; large black-eye seed; photoperiod insensitive; erect growth habit; early maturing | Heat tolerant, resistant to root-knot nematode, Fusarium wilt, and foliar thrips     |
| IT93K-503-1 | IITA                | High yielding under drought in Senegal; brown-eye seed; stay-green under drought                                             | Drought tolerant, resistant to nematodes, Fusarium wilt, and <i>Macrophomina</i>     |
| IT89KD-288  | IITA                | High yielding under drought in Burkina Faso and Nigeria; brown-eye seed; photoperiod sensitive                               | Root-knot nematode resistant                                                         |
| IT84S-2049  | IITA                | High yielding under drought in Burkina Faso; brown-eye seed; erect growth habit                                              | Resistant to aphid, bacterial blight, viruses, root-knot nematode                    |
| IT82E-18    | IITA                | High yielding under drought in Mozambique; early maturing, light-brown seed; photoperiod insensitive                         | Broadly adapted, resistant to root-knot nematode                                     |
| IT00K-1263  | IITA                | High yielding under drought in Mozambique and Nigeria; dark-brown seed; stay-green under drought                             | Resistant to Striga, aphid, fusarium wilt, root-knot nematode                        |
| IT84S-2246  | IITA                | High yielding under drought in Burkina Faso and Mozambique; dark-brown seed                                                  | Resistant to aphid, bacterial blight, viruses, root-knot nematode                    |

134 <sup>a</sup> INERA: Institut de l'Environnement et des Recherches Agricole, Burkina Faso; UCR: University  
 135 of California – Riverside, United States; IITA: International Institute of Tropical Agriculture,  
 136 Nigeria.

137

138 *Population development*

139 The eight parents were inter-mated using a mating strategy described in Cavanagh et al. (2008)  
 140 with some modifications. In spring 2010, initial crosses were made between 4 pairs of founder  
 141 parents (IT89KD-288 x IT84S-2049, CB27 x IT82E-18, SuVita 2 x IT00K-1263, and IT84S-2246  
 142 x IT93K-503-1, designated as A x B, C x D, E x F, and G x H, respectively) to produce 2-way F1s.  
 143 In spring 2011, reciprocal 4-way crosses were made between 2 pairs of the 2-way F1s to produce  
 144 4-way F1s. In fall 2011, 330 pair crosses were made between 330 4-way F1 plants of the pedigrees  
 145 ABCD and 330 4-way F1 plants of the pedigrees EFGH to produce 331 8-way F1s. Single seed  
 146 descent (SSD) was then applied for each unique 8-way F1 until the F8 generation. For each F8  
 147 RIL, seeds from the F8 single plant were harvested and maintained as an original seed stock (F8:9).  
 148 The F8:9 seeds were then increased in bulk to make F8:10 seeds for phenotyping.

149 *SNP genotyping*

150 The F1 progeny from 2-way crosses were verified by genotyping their F2 seeds (up to 21 seeds  
151 per cross) with 89 parent-unique SNPs using the kompetitive allele-specific polymerase chain  
152 reaction (KASP) cowpea assay (LGC Genomics Ltd., Hoddesdon, UK) (SEMAGN *et al.* 2014),  
153 which was converted from the 1536 SNP Illumina GoldenGate Assay developed by Muchero *et*  
154 *al.* (2009a). True F1 plants were confirmed when polymorphic markers were found segregating in  
155 the corresponding F2 progeny.

156 The F8 single plants derived from 8-way crosses were genotyped with 51,128 SNPs using the  
157 Illumina iSelect BeadArray (MUÑOZ-AMATRIAIN *et al.* 2017). A core set of MAGIC RILs was  
158 selected through the following consecutive steps: (1) Lines carrying non-parental alleles or excess  
159 numbers of heterozygous and ambiguous genotypes were excluded; (2) Based on parent-unique  
160 SNPs, lines that did not carry male-parent alleles (*i.e.*, selfing) at the 4-way or 8-way crosses were  
161 also excluded; (3) Among true 8-way RILs and eight parents, genetic similarities were measured  
162 using the allele-sharing method (BOWCOCK *et al.* 1994) with the software GGT 2.0 (VAN BERLOO  
163 2008), from which phylogenetic relationships were generated using the neighbor-joining method  
164 (Saitou and Nei, 1987) and visualized using the software MEGA 5.05 (Tamura *et al.*, 2011); and  
165 (4) For each set of genetically identical RILs (similarity 0.99 or higher), the line with the lowest  
166 number of ambiguous genotypes was retained in the core set for further analyses.

167

168 *MAGIC phenotyping*

169 The MAGIC RILs and parents were screened for photoperiod sensitivity under long-daylength  
170 conditions during summer, from June (14.5 hours) to September (12.8 hours), at the UCR Citrus  
171 Experiment Station, California (UCR-CES, 33.97°N, 117.34°W). In 2015, each MAGIC RIL and  
172 parent was planted in one row of 0.76 m wide and 5.5 m long at a density of 12 seeds per meter  
173 using a tractor-mounted planter. The field was watered to capacity before and after planting up to  
174 100 days using furrow irrigation. The experiment was repeated in 2016 but under restricted  
175 irrigation. The field was watered to capacity before planting, and then irrigation was withheld until  
176 the end of trial. For each line in both trials, calendar days to flowering were determined when 50%  
177 of plants in the plot flowered.

178 The population was also screened under short daylength conditions during autumn, from  
179 September (12.8 hours) to December (9.9 hours), at the Coachella Valley Agricultural Research  
180 Station, California (CVARS, 33.52°N, 116.15°W). In 2015, the population was planted in two  
181 blocks receiving different watering regimes (full irrigation and restricted irrigation) and separated  
182 by a 6-row buffer (5 m). In each block, each MAGIC RIL and parent was planted in one row of  
183 0.76 m wide and 3.5 m long at a density of 12 seeds per meter using a tractor-mounted planter.  
184 The field was watered to capacity before and after planting using subsurface drip irrigation. After  
185 two weeks when the seedlings were well established, the irrigation was withheld in the restricted-  
186 irrigation block until maturity, whereas in the full-irrigation block the rows were watered to  
187 capacity up to 100 days after planting. In 2016, the two experiments (full irrigation and restricted  
188 irrigation) were repeated on adjacent field blocks at CVARS. For each line in four experiments,  
189 calendar days to flowering were determined when 50% of plants in the plot flowered. Plant growth  
190 habit was measured 40 days after planting using a visual rating scale from 1 to 6 based on the  
191 angles formed between primary branches and the main stem: (1) Acute erect, branches form angles  
192 less than 45° with the main stem, (2) Erect, branching angles between 45° – 90° with the main  
193 stem, (3) Semi-erect, branches perpendicular to the main stem but not touching the ground, (4)



194 Intermediate, lower branches touching the ground, (5) Semi-prostrate, lower branches flat on the  
195 ground but the main stem standing upright, and (6) Prostrate, the entire plant flat and spreading on  
196 the ground. Days to maturity were determined when 95% of pods in the plot had dried. At maturity,  
197 the plants in each plot were cut at the lower stems and machine-threshed for measurement of plot  
198 yield and 100-seed weight.

199 For each set of repeated trials at UCR-CES and CVARS, analysis of variance (ANOVA) was  
200 performed with the software GenStat version 11 (PAYNE *et al.* 2008). Factors in the ANOVA  
201 model were lines and block, with each field site receiving one watering treatment considered as a  
202 block. Broad-sense heritability was estimated based on the variance component attributable to  
203 variation among lines (VG) and residual variation (VE) ( $h^2 = VG/(VG + VE)$ ). Nonparametric  
204 Spearman's rank correlation analysis was also used to examine the consistency in genotypic  
205 ranking of the same lines between environments.

206

### 207 *Association mapping*

208 Polymorphic SNPs (success rate > 90% and minor allele frequency > 0.05) with known positions  
209 across 11 cowpea pseudomolecules (LONARDI *et al.* 2017) were used for genetic mapping, with a  
210 new chromosome numbering convention based on synteny between cowpea and common bean.  
211 Genome-wide association studies (GWAS) were performed with the software TASSEL 5.0  
212 (BRADBURY *et al.* 2007) using the mixed linear model (MLM) function that incorporated  
213 population principal components and kinship analyses. A LOD threshold of 4 was used to indicate  
214 QTL significance.

215 To verify QTL detected for photoperiod sensitivity in the MAGIC population, a biparental  
216 mapping population including 92 F8-derived F9 RILs from a cross between the non-photoperiod  
217 sensitive parent CB27 and the photoperiod sensitive IT97K-556-6 was screened under long-  
218 daylength conditions at UC Riverside in 2016. Each RIL and parent were planted in one row 0.76  
219 m wide and 5.5 m long at a density of 12 seeds per meter using a tractor-mounted planter. The  
220 planting time and experimental conditions were similar to the MAGIC phenotyping trial in 2015.  
221 For each plot, days to flowering were determined when 50% of plants in the plot flowered. The  
222 biparental RIL population was genotyped with the 51,128 SNP Illumina iSelect BeadArray that  
223 was used to genotype the MAGIC population. Construction of genetic maps and QTL analysis  
224 were performed with the software QTL IciMapping 4.0 (MENG *et al.* 2015) using the Inclusive  
225 Composite Interval Mapping (ICIM) method (WANG 2009).

226

### 227 *Recombination analysis*

228 Based on physical positions of polymorphic SNPs on 11 cowpea pseudomolecules, pair-wise  
229 linkage distances (in centimorgans) between every two adjacent SNPs were estimated as  $d =$   
230  $[(recombinants/n) \times 100]$ , where *recombinants* are MAGIC lines that carry SNP genotypes that  
231 are not present in any of the eight parents (Supplemental File S1), and *n* is the number of MAGIC  
232 lines carrying valid SNP genotypes. Using a sliding window of 2 Mb with 1 Mb increments along  
233 each chromosome, recombination rates (cM/Mb) were calculated as the linkage distance divided  
234 by the physical distance between the first and the last SNP of each window. The recombination-  
235 rate variation was visualized by plotting the estimated recombination rate for every 1-Mb  
236 increment along the 11 chromosomes.

237 *Resource and data availability*

238 The MAGIC core set and their 8 founder parents are available on request at the IITA, Ibadan,  
239 Nigeria and University of California Riverside, USA cowpea germplasm banks. QTL information  
240 for photoperiod sensitivity and seed size is provided in Supplemental Files S2 and S3, respectively.  
241 Genotypic and phenotypic data used in GWAS and biparental mapping are included in  
242 Supplemental Files S4 and S5, respectively.

243

244

245 **Results**

246 *MAGIC development and genotyping*

247 In total 365 MAGIC F8 RILs were generated from 330 unique 8-way crosses. Among these, 29  
248 crosses produced two or more F8 RILs, which were sister lines separated from earlier generations.  
249 These lines were purposely created to maintain the population size. Reciprocal crosses were made  
250 at the 4-way and 8-way cycles, resulting in RILs with different maternal parents, including CB27  
251 (225 lines), IT89KD-288 (111 lines), Suvita 2 (9 lines), and IT84S-2246 (5 lines). There were 15  
252 lines with illegible pedigrees on tags that were bleached by sunlight and moisture in the  
253 greenhouse.

254 Genotyping with the 51,128-SNP Illumina iSelect BeadArray resulted in 36,346 SNPs that were  
255 polymorphic between the 8 parents (68.26%). Among these, 11,848 SNPs were parent-unique,  
256 each of which could distinguish one parent from the other 7 parents. Based on parent-unique SNPs,  
257 15 RILs lacked male-parent alleles at the 2-way/4-way intercrosses and probably resulted from  
258 accidental selfing during artificial pollination. Three RILs were found to carry non-parental alleles  
259 in that they were heterozygous at SNP loci that were monomorphic between the 8 parents. Except  
260 for five RILs with more than 10% of heterozygosity, the rest of the population had a low level of  
261 heterozygosity, ranging from 0 to 3.33%. There were 8 RILs each showing very similar SNP  
262 genotypes (more than 99%) to another RIL, and these were considered as redundant duplicates.  
263 After excluding lines with duplicates, selfing errors, non-parental alleles and excess  
264 heterozygosity, a core set of 305 MAGIC RILs derived from 305 unique 8-way crosses was  
265 selected for further analysis. These RILs appeared highly diverse and clustered uniformly relative  
266 to their eight parents, among which IT89KD-288, IT84S-2246 and IT97K-503-1 were closer to  
267 each other than the other parent to parent relationships which were dispersed throughout the  
268 population structure (Fig. 1).

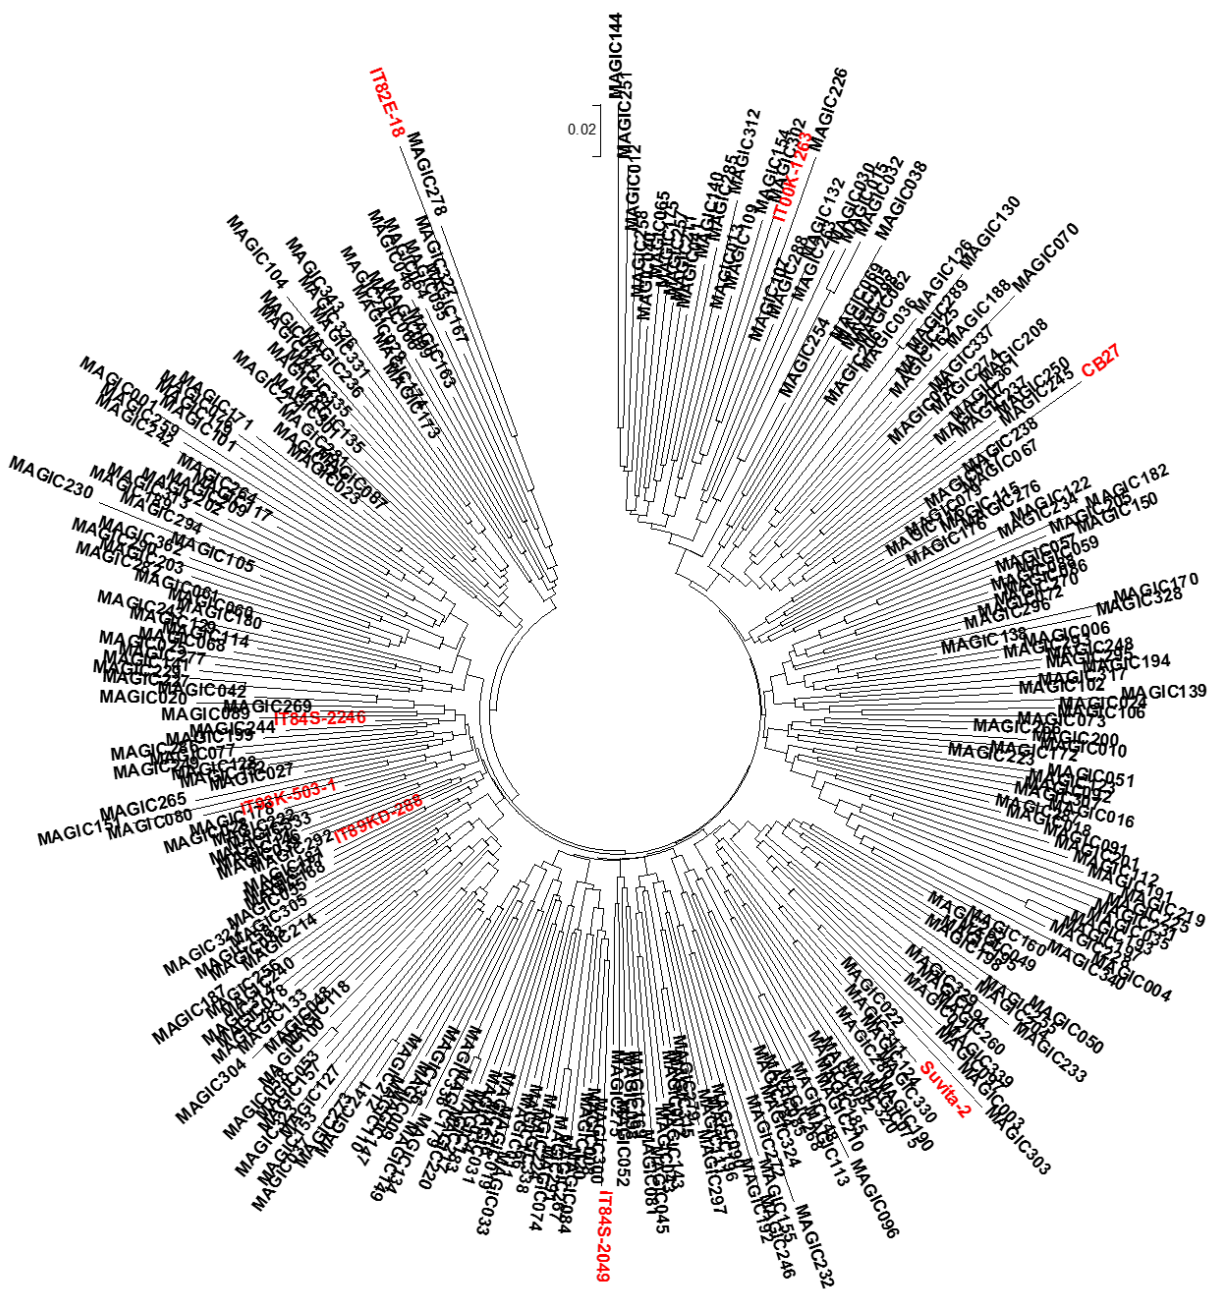

269  
 270 **Figure 1.** Phylogenetic relationships among the 305 F8 RILs of the cowpea MAGIC core set and  
 271 eight parents (in red) based on 11,848 parent-unique SNPs



272 *Phenotypic variation in the MAGIC population*

273 The F8 lines were highly diverse in morphological traits including flowering time, growth habit,  
274 flower color, leaf shape, and seed characteristics (size, shape, color and texture) (Fig. 2). The  
275 flowering time varied widely in the population under both long- and short-daylength conditions  
276 (Fig. 3). The genotypic differences in flowering time were quite stable across contrasting watering  
277 regimes in each daylength condition, with broad-sense heritability estimated as 0.77 and 0.71 at  
278 UCR-CES (long daylength) and CVARS (short daylength), respectively. There was a significant  
279 correlation ( $r = 0.63$ ,  $P < 0.001$ ) in phenotypic ranking between the long- and short-daylength  
280 conditions, although the absolute flowering time varied considerably among lines. At UCR-CES  
281 (long daylength), the population started flowering as early as 43 days after planting, but there were  
282 many lines with delayed flowering beyond 60 days after planting (Fig. 3a and 4a). In contrast,  
283 under short daylength at CVARS, the population started flowering as early as 34 days after planting  
284 and the population completed flowering within another month (63 days) (Fig. 3b and 4b). Among  
285 the parents, CB27 (36 and 44 days) was the earliest to flower while IT89KD-288 (46 and 88 days)  
286 was the most delayed in both environments (CVARS and UCR-CES, respectively).

287 None of the MAGIC RILs or parents showed prostrate growth habit. Under full irrigation, the  
288 majority of MAGIC RILs had a growth habit ranging from semi-erect to erect under both short-  
289 and long-daylength conditions (Fig. 4). There was significant but moderate correlation in the  
290 growth habit scores between the two daylength conditions ( $r = 0.55$ ,  $P < 0.001$ ), with about 55%  
291 of the lines showing consistent growth habit between the two environments. Lines with semi-  
292 prostrate growth habit under long-daylength became intermediate or semi-erect type when grown  
293 under short-daylength condition. Among the parents, CB27 (acute erect) and IT84-2049 (erect),  
294 IT89KD-288 (semi-erect) and Suvita-2 (semi-erect) maintained their growth habit in both short-  
295 and long-daylength conditions under the full-irrigation regime. Under restricted irrigation, the  
296 MAGIC RILs and parents mostly showed erect or acute erect growth.

297 Maturity varied considerably in the MAGIC population grown under different watering regimes  
298 at CVARS in 2015 and 2016. Broad-sense heritability was estimated as 0.47, with significant but  
299 moderate correlations ( $r = 0.53$ ,  $P < 0.001$ ) existing in the phenotypic ranking between the two  
300 watering conditions (normal and restricted irrigation). Transgressive segregation was also  
301 observed. Some lines were fully mature as early as 60 days after planting under both watering  
302 regimes, while others were still green and kept producing pods after 120 days under restricted  
303 irrigation in 2015, including two parents (IT00K-1263 and IT93K-503-1) and 66 MAGIC RILs  
304 (21% of the population).

305 Grain yield and seed size also varied considerably under both water-restricted and full irrigation  
306 conditions at CVARS (Fig. 5). The plants generally produced much higher yield and developed  
307 larger seeds under full irrigation compared to water-stress conditions. Seed size appeared much  
308 more stable in the genotypic ranking than grain yield, with broad-sense heritability estimated as  
309 0.76 and 0.30, respectively. Transgressive segregation was observed for both traits. Approximately  
310 11% of MAGIC RILs yielded higher than all parents under restricted irrigation conditions. Among  
311 the parents, CB27 consistently had the highest yield and seed size across the two environments.

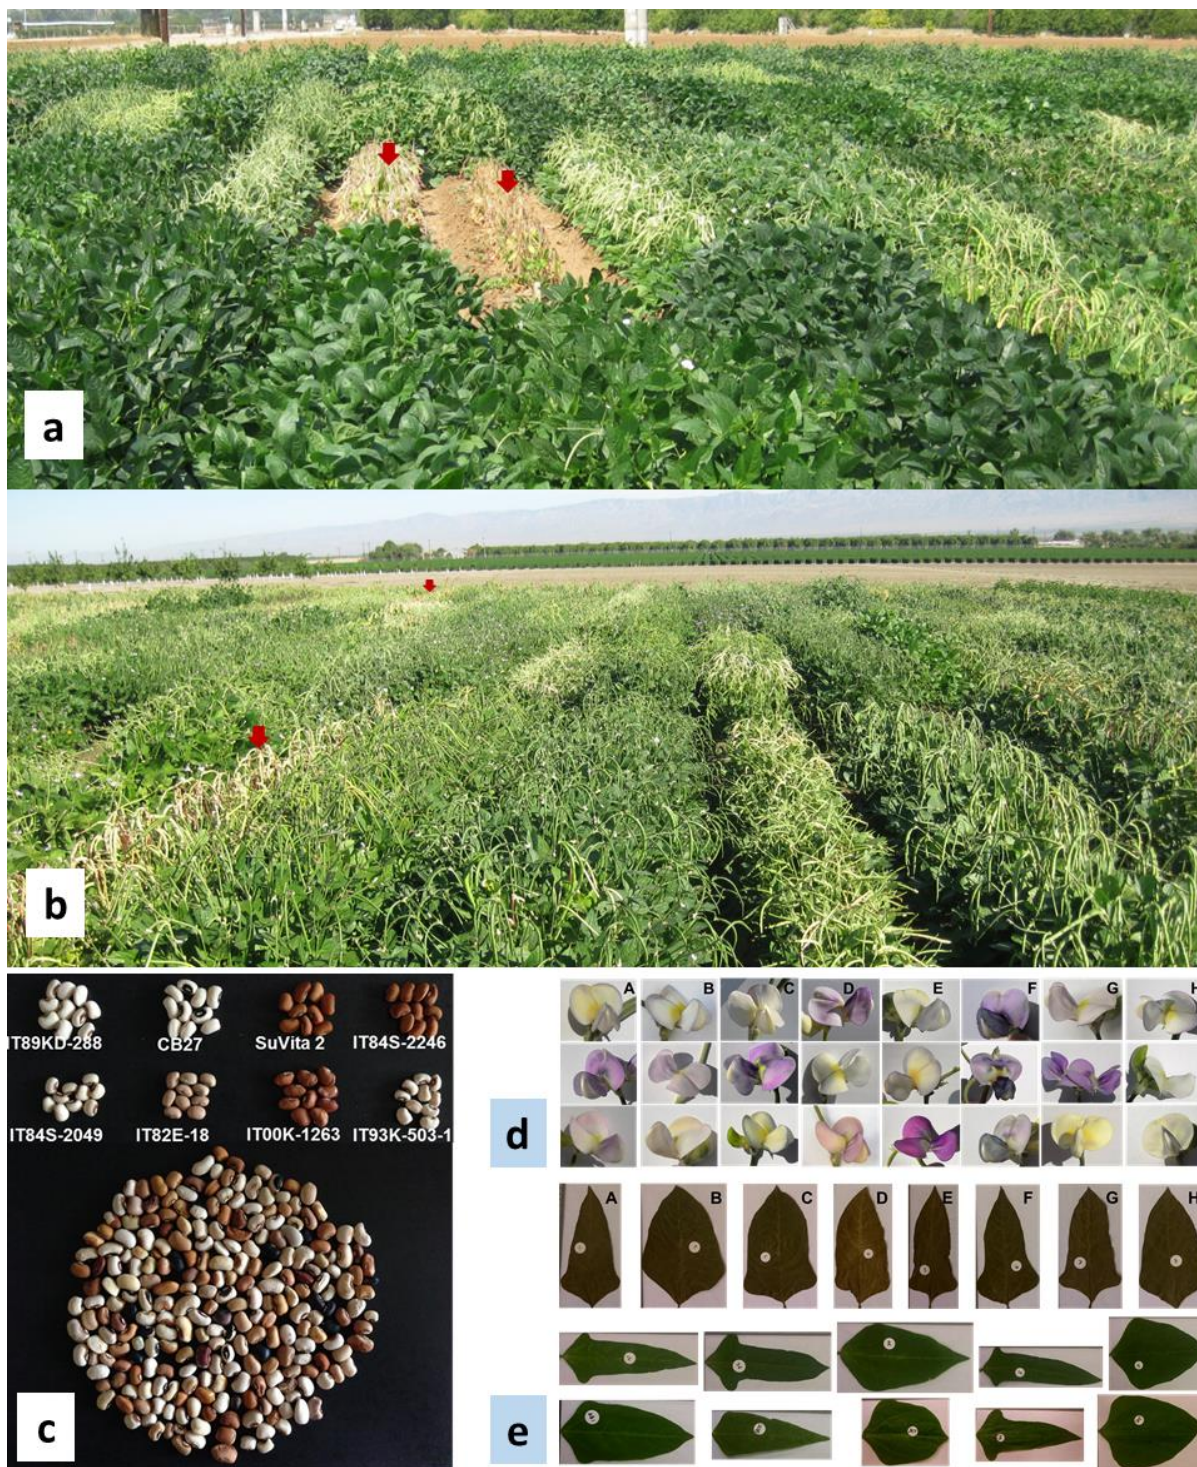

312

313 **Figure 2.** Morphological variation in the cowpea MAGIC population: Plant appearance at 65 days  
314 after planting under (a) long-daylength conditions at UCR-CES in 2015 and (b) short-daylength  
315 conditions at CVARS in 2016, both under full irrigation; (c) seed appearance, (d) flower color and  
316 (e) leaf shape of parents (top panel) and a representation of MAGIC F8 RILs (in lower part of 2c,  
317 each seed is from a different F8 RIL). In 2a and 2b, red arrows indicate examples of lines that  
318 matured earlier than other lines. In 2d and 2e, parent codes are: A, IT89KD-288; B, IT84S-2049;  
319 C, CB27; D, IT82E-18; E, Suvita-2; F, IT00K-1263; G, IT84S-2246; H, IT93K-503-1.



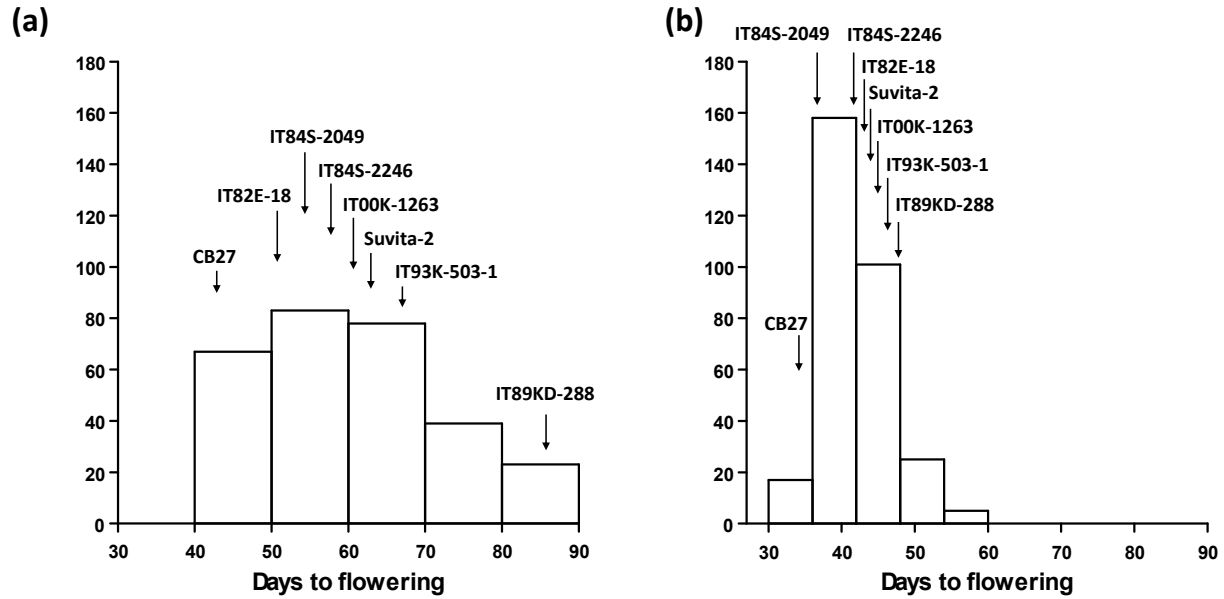

320

321 **Figure 3.** Variation in flowering time measured in the MAGIC core set and eight parents grown  
 322 under (a) long-daylength conditions at UCR-CES and (b) short-daylength conditions at CVARS.  
 323 Mean flowering time values for each line were derived from two experiments at UCR-CES and  
 324 four experiments at CVARS during 2015-2016.

325

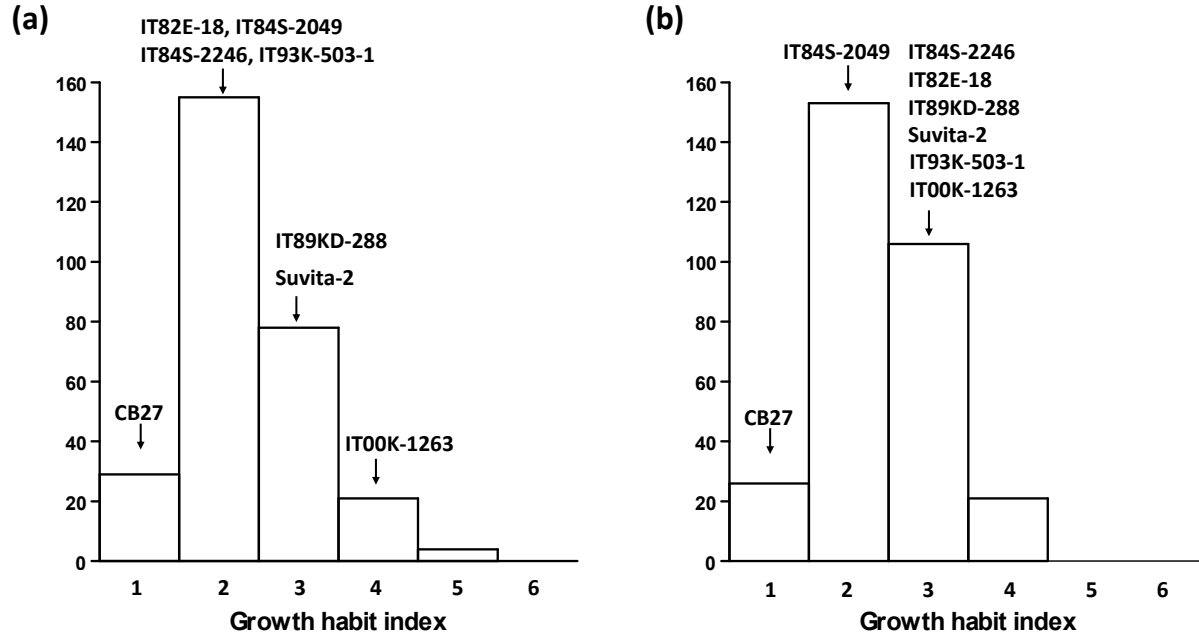

326

327 **Figure 4.** Variation in plant growth habit measured in the MAGIC core set and eight parents grown  
 328 under full irrigation with different photoperiod conditions: (a) long-daylength at UCR-CES in  
 329 2015 and (b) short-daylength at CVARS in 2015 and 2016 (means of 2 years). Growth habit index:  
 330 (1) acute erect, (2) erect, (3) semi-erect, (4) intermediate, (5) semi-prostrate, and (6) prostrate.

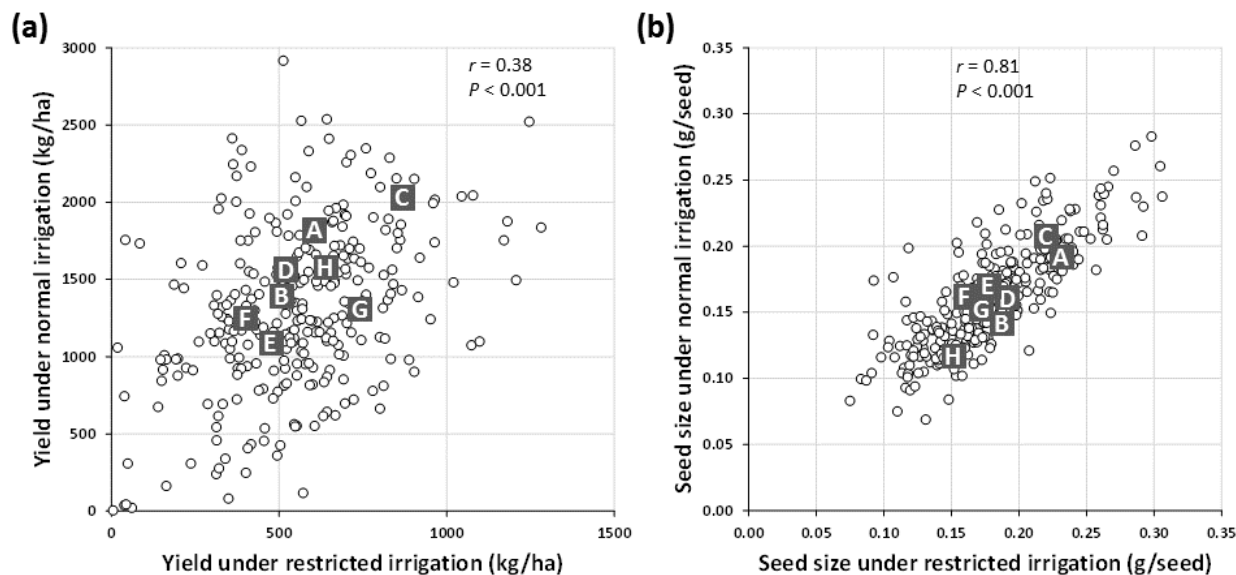

331

332 **Figure 5.** Variation in (a) dry grain yield and (b) seed size measured in the 305-RIL MAGIC core  
333 set and parents grown under restricted and normal irrigation regimes at CVARS in 2015 and 2016.  
334 Each dot represents a MAGIC RIL based on mean phenotypic values of two years of data. Labeled  
335 solid squares are MAGIC parents (A: IT89KD-288, B: IT84S-2049, C: CB27, D: IT82E-18, E:  
336 Suvita-2, F: IT00K-1263, G: IT84S-2246, H: IT93K-503-1).

337

### 338 *Detection of marker-trait associations*

339 From the 36,346 polymorphic SNPs, after removing those with  $MAF \leq 0.05$  and successful calling  
340 rate  $\leq 90\%$ , the remaining 33,768 SNPs with known positions on 11 cowpea pseudomolecules  
341 were used in GWAS. The MLM analysis consistently detected three clusters of SNPs on  
342 chromosomes 5, 9 and 11 significantly associated with photoperiod sensitivity expressed in the  
343 MAGIC population grown under long-daylength conditions at UCR-CES in 2015 (full irrigation,  
344 Fig. 6a) and 2016 (restricted irrigation, Fig. 6b). Markers with major effects were located on  
345 chromosome 9 (max LOD = 9.3), explaining up to 15% of total phenotypic variance, with  
346 favorable (earlier flowering time) alleles contributed from CB27 and IT82E-18. Markers with  
347 smaller effects were located on chromosomes 5 and 11 (max LOD = 5.8), explaining up to 9% of  
348 total phenotypic variance. Under the short-daylength condition, the significant peaks on  
349 chromosomes 5 and 9 remained, albeit with smaller effects (max LOD = 6.5, explaining 9% of  
350 phenotypic variance) while the peak on chromosome 11 was not significant (Fig. 6c and 6d).

351 Markers significantly associated with plant growth habit were identified on distal regions of  
352 chromosomes 1 and 9 based on data from short-daylength and full irrigation experiments at  
353 CVARS (Fig. 6e). Markers of highest significance (max LOD = 4.3) explained up to 9% of total  
354 phenotypic variance, with favorable alleles (more erect growth) contributed from IT89-KD288 and  
355 CB27. This region also coincided with markers affecting flowering time under the short-daylength  
356 condition (Fig. 6d), with the more erect-growth alleles associated with earlier flowering time. No  
357 significant association was found for growth habit under restricted irrigation.

358 Marker peaks on chromosomes 5, 8 and 9 with significant or marginal effects on maturity also  
359 coincided with marker peaks affecting flowering time under short-daylength conditions at CVARS



360 (Fig. 6g and 6h). For grain yield under restricted irrigation at CVARS, a significant peak was  
361 detected, located on chromosome 8 (max LOD = 4.4, explaining 6% of phenotypic variance) (Fig.  
362 6j) while no significant markers were identified for grain yield under normal irrigation (Fig. 6i).  
363 In contrast, markers with major effects were identified for seed size on chromosome 8 based on  
364 data from both water-restricted and full-irrigation conditions (Fig. 6k and 6l). Markers of highest  
365 significance (max LOD = 7.3) explained up to 11% of total phenotypic variance, with favorable  
366 (larger seed) alleles contributed by IT82E-18 and IT00K-1263. These markers also flanked the  
367 region previously mapped for seed size using a biparental RIL population (CB27 x IT82E-18),  
368 with the favorable allele contributed from IT82E-18 (LUCAS *et al.* 2013b) (Supplemental File S2).  
369 The other region with minor effects on seed size under both water regimes was found located on  
370 chromosome 6 (max LOD = 4.0), explaining 5% of total phenotypic variance, with favorable  
371 alleles contributed from IT89KD-288, Suvita-2, IT84S-2246 and IT93K-503-1.

372 In general, markers significantly associated with agronomic trait determinants appeared to  
373 distribute around distal regions of chromosomes. Neither maternal effect nor its interaction with  
374 trait-associated SNPs for each agronomic trait were significant.

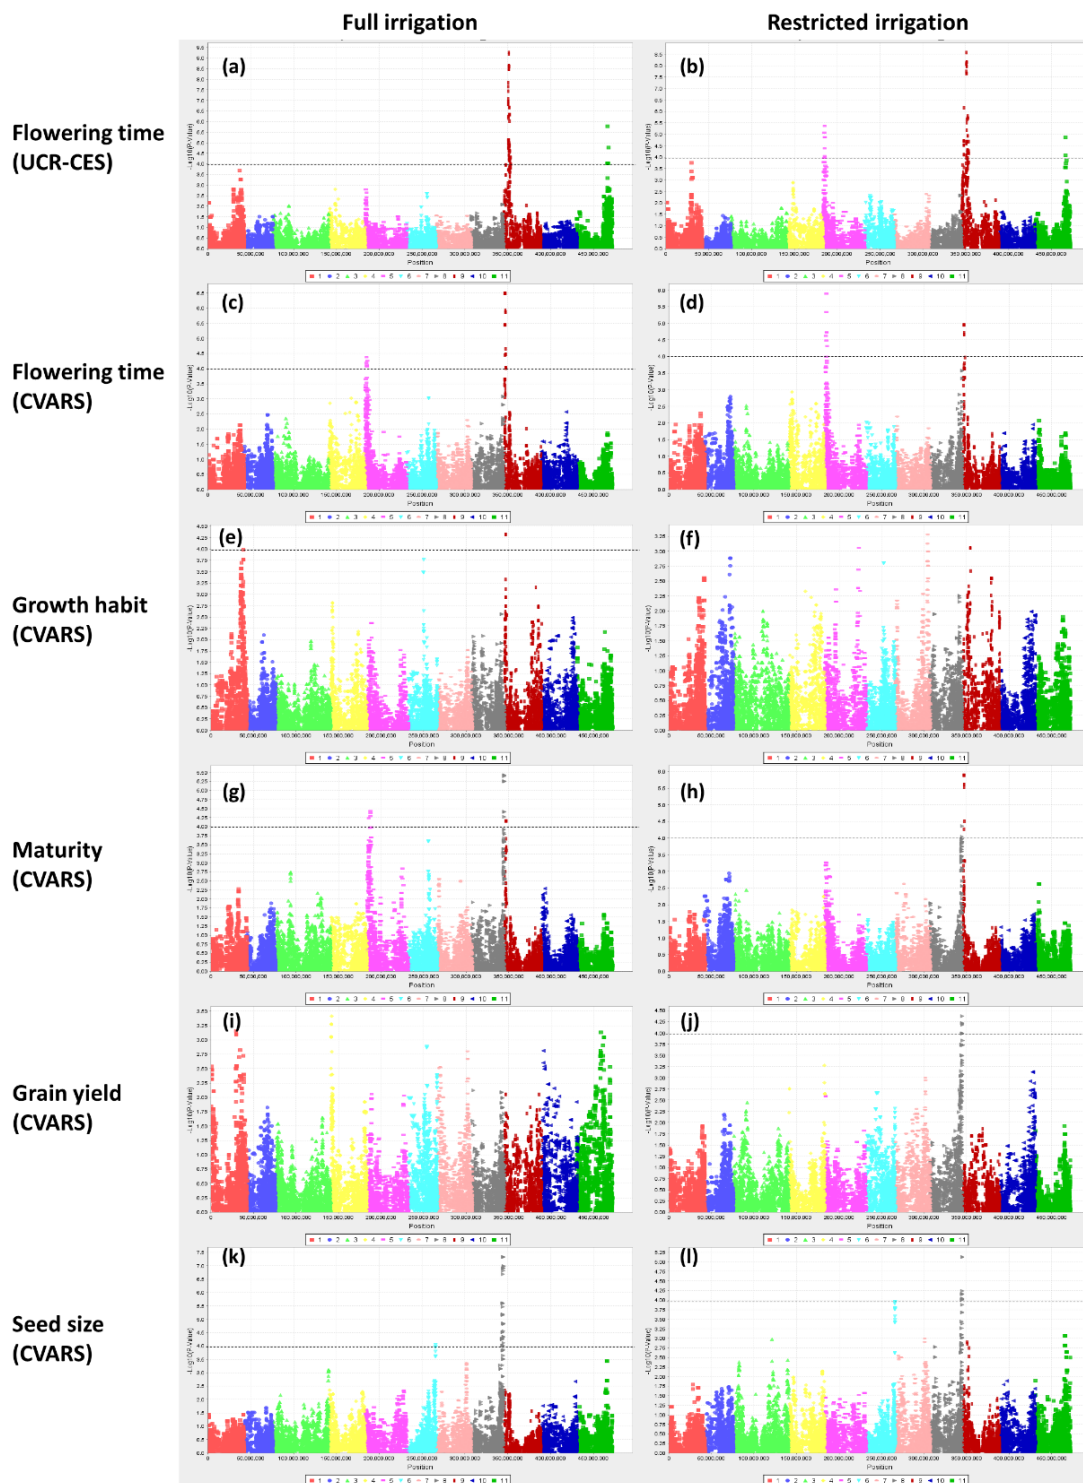

375  
 376 **Figure 6.** GWAS Manhattan plots depicting chromosomal regions associated with variation in  
 377 agronomic traits measured in the MAGIC population grown under full irrigation (left) and  
 378 restricted irrigation (right) with long-daylength conditions at UCR-CES (a-b) and short-daylength  
 379 conditions at CVARS (c-l). Phenotypic values at CVARS were means of two years of data, except  
 380 for growth habit which was not measured under restricted irrigation in 2016. The dashed lines  
 381 correspond to the significance threshold  $-\log_{10}(0.0001)$ .

382 *Validation of photoperiod QTL in biparental RILs*

383 Flowering time varied widely in the CB27 x IT97K-556-6 RIL population grown under long-  
384 daylength condition at UCR-CES in 2016 (Fig. 7). CB27 began flowering 44 days after planting  
385 while IT97K-556-6 delayed flowering until after 70 days. A major QTL for flowering time was  
386 detected on linkage group 9 (LOD = 7.8, explaining 30% of phenotypic variance) (Fig. 8). The  
387 favorable (early flowering) allele was contributed from CB27. SNP markers flanking this QTL  
388 were 2\_04691 and 2\_00735 (and their co-segregating SNPs), which were found to be located in  
389 the same region as the major QTL detected in the MAGIC population grown under the same long-  
390 daylength condition in 2015 (Supplemental File S3).

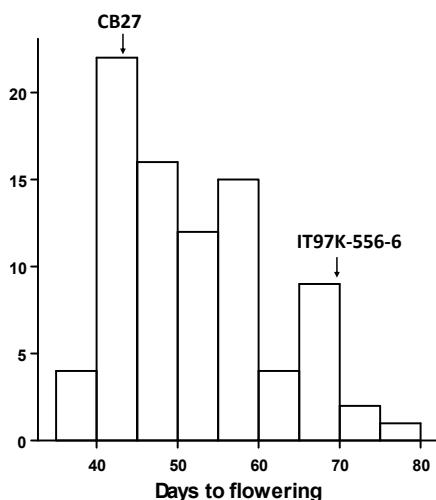

391  
392 **Figure 7.** Variation in flowering time expressed in the CB27 x IT97K-556-6 biparental RIL  
393 population grown under long-daylength conditions at UCR-CES in 2016.

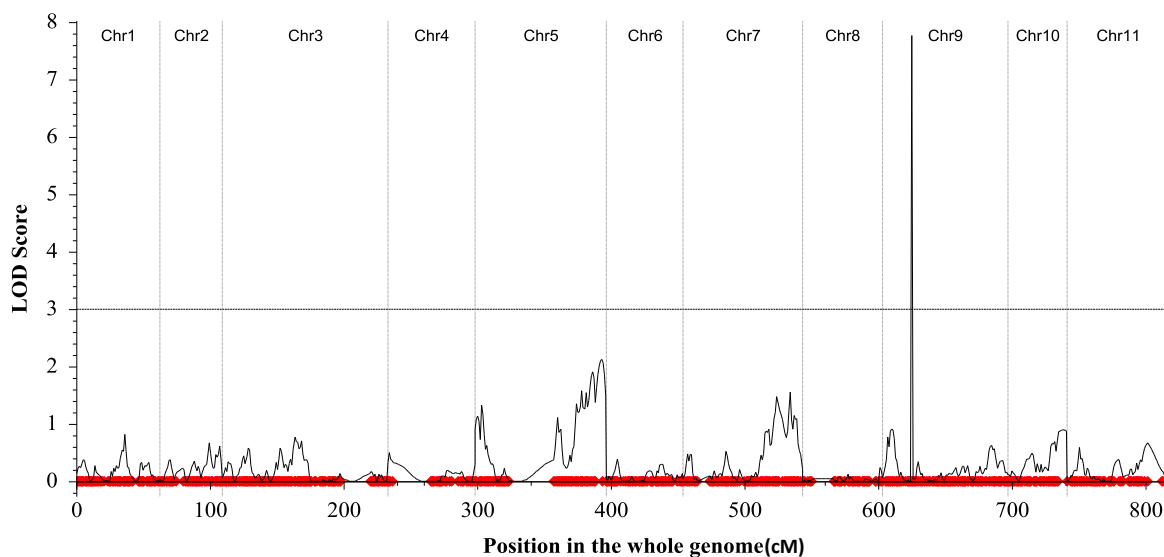

394  
395 **Figure 8.** Chromosomal regions associated with variation in flowering time measured in the CB27  
396 x IT97K-556-6 biparental RIL population under long-daylength conditions at UCR-CES in 2016.  
397 The LOD peak on linkage group 8 is flanked by SNP markers 2\_10023 and 2\_04691, which are  
398 in the same region of the major QTL detected in the MAGIC population (see Fig. 6a).

399 *Recombination rate variation*

400 Based on recombination analysis of 33,768 polymorphic SNPs, the crossovers appeared to  
 401 distribute throughout the MAGIC genome, at an average of 1.43 cM/Mb, and more frequently on  
 402 or near the telomeric distal regions of chromosomes (Fig. 9), where most trait-associated SNPs  
 403 were detected by GWAS (Fig. 6). Several recombination hot-spots with more than 5 cM/Mb were  
 404 detected on the distal long arms of chromosomes 1, 2, 5 and 11, while fairly large disequilibrium  
 405 blocks also were found on most chromosomes. On average, chromosome 3 had the highest  
 406 recombination rate (1.76 cM/Mb) while chromosome 10 had the lowest (0.88 cM/Mb).

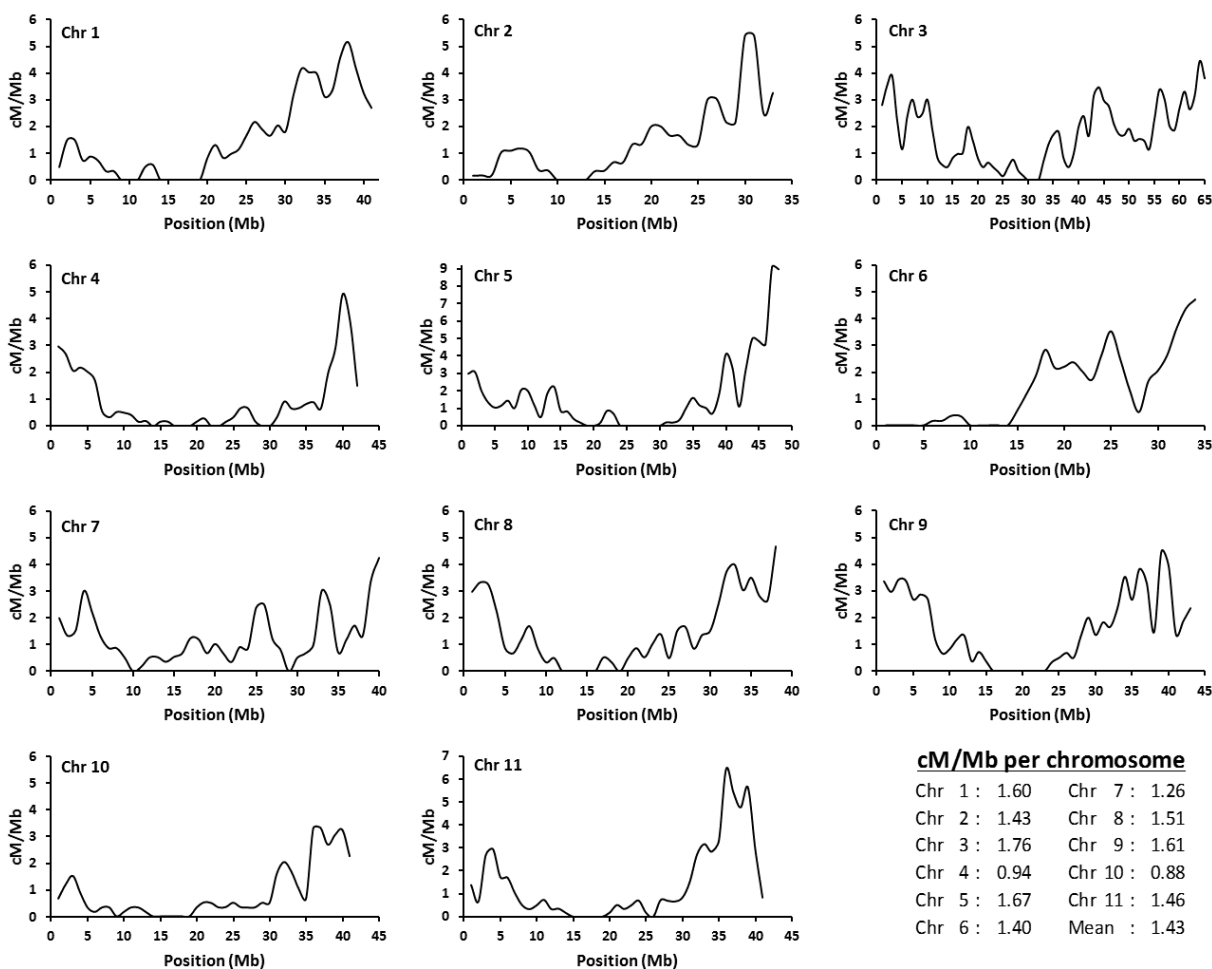

407  
 408 **Figure 9.** Recombination rate (cM/Mb) variation along 11 cowpea chromosomes measured in the  
 409 8-way cowpea MAGIC population using a sliding window of 2 Mb with 1 Mb increments.



## 410 Discussion

### 411 *MAGIC development*

412 The wide phenotypic variation with significant transgressive segregation observed in the cowpea  
413 MAGIC population indicates that genome regions from parents were highly recombined in the  
414 RILs. In fact, the population was developed in a way that maximized genetic variation. At the 2-  
415 way crosses, plants in each F1 set were heterozygous and homogeneous because the 8 founder  
416 parents were highly inbred lines. However, the F1s derived from the 4-way crosses segregated and  
417 exhibited significant variation. To capture as much variation as possible, we performed more than  
418 300 pair-wise crosses, also including reciprocal pairs, between different 4-way F1 individuals. In  
419 addition, there was no intended selection for any trait during the SSD process. The plants were  
420 grown in UCR greenhouses with optimal temperature, fertilizer, irrigation and pest and disease  
421 management. In some cases, the plants were grown during long-daylength conditions in summer,  
422 but the photoperiod sensitive lines which failed to become reproductive in the summer were  
423 maintained and allowed to set flowers and pods later in the autumn when the daylength shortened,  
424 to avoid selection against photoperiod sensitivity. There was also no selection for preferable seed  
425 characteristics, plant type or yield components. This blind SSD process therefore helped create the  
426 high diversity in morphological and agronomic traits that we observed in this MAGIC population  
427 (Fig. 2-5).

428 The genetic integrity of the cowpea MAGIC population was also confirmed by the results of high-  
429 density SNP genotyping. We used 89 parent-unique SNP markers from the Illumina GoldenGate  
430 Assay (MUCHERO *et al.* 2009a) to validate true 2-way F1 crosses to avoid possible mistakes from  
431 the early stage of MAGIC development. We then used 11,848 parent-unique SNPs from the  
432 recently developed Illumina iSelect 60K SNP assay (MUÑOZ-AMATRIAÍN *et al.* 2017) to confirm  
433 true 8-way RILs and to eliminate those that appeared to be selfed at the 4-way or 8-way crosses.  
434 The SNP genotyping also identified lines with non-parental alleles, identical SNP genotypes, or  
435 excess heterozygosity. Fortunately, very few of these unexpected lines were found (16 out of 365  
436 lines), some of which were replaced by sister lines that were purposely developed as backups. By  
437 removing all erroneous lines and keeping one RIL from each unique 8-way cross, we created a  
438 MAGIC core set of 305 RILs that are highly homozygous and genetically distinct from each other  
439 and from the eight parents (Fig. 1). As such, they can serve as permanent genetic materials for use  
440 in replicated phenotyping trials. Despite its compact size relative to MAGIC populations  
441 developed for *indica* rice (2000 lines) (BANDILLO *et al.* 2013) and winter wheat (1091 lines)  
442 (MACKAY *et al.* 2014), the cowpea 305 RIL MAGIC core set is less management-intensive and  
443 easier to phenotype, especially under field conditions, while still capable of accurately detecting  
444 trait-associated markers as discussed in the following section.

445

### 446 *MAGIC genetic analysis*

447 Based on SNP genotyping, the 36,346 markers segregating in the cowpea MAGIC population were  
448 almost double those identified in every bi-parental RIL population genotyped with the same SNP  
449 array (MUÑOZ-AMATRIAÍN *et al.* 2017). This is attributable to the 8 founder parents having been  
450 chosen on the basis of phenotypic and genetic diversity found in earlier studies. The parents were  
451 high yielding under drought in one or more countries, resistant to different biotic stress factors

452 (Table 1), and represented the two major gene pools of cowpea centered in West Africa and  
453 southeastern Africa (HUYNH *et al.* 2013a). By applying multiple 2-way, 4-way and 8-way  
454 intercrosses from those founders, plus 8 generations of single seed descent for over 300  
455 independent 8-way pair crosses, one would expect more recombination events to occur in the  
456 MAGIC than in bi-parental RILs. However, it is difficult to measure accurately the number of  
457 crossovers between two SNP markers due to a lack of parent-specific alleles at each locus. At each  
458 SNP marker, one allele represents one or more parents, and the alternative allele represents the  
459 other parents, so in some cases it is impossible to identify the actual parent carrying the allele at  
460 that locus if multiple parents bear a common allele. The recombination rate estimated in this study  
461 was based only on the obvious recombinants between two SNPs (Supplemental File S1) and thus  
462 may underestimate their true genetic distance. Despite this, the current estimated recombination  
463 rate was still relatively high and varied considerably along 11 cowpea chromosomes (Fig. 9),  
464 supporting a high level of crossing over as expected in the MAGIC population. The pattern of  
465 variation along chromosomes appears consistent with information reported for *Drosophila* (HEY  
466 and KLIMAN 2002) and human genomes (MCVEAN *et al.* 2004) where the recombination was often  
467 elevated near telomeres and suppressed near centromeres.

468 The relatively high recombination rates near the telomeres imply that haplotype variation occurs  
469 at a high level, thereby facilitating random association needed for QTL detection. This is in  
470 accordance with our GWAS analysis showing that trait-associated SNPs were mostly distributed  
471 near the telomeric regions (Fig. 6). In addition, markers with major effects detected in the cowpea  
472 MAGIC population for photoperiod sensitivity and seed size were verified by bi-parental genetic  
473 mapping, indicating that the MAGIC core set is effective for mapping genome regions harboring  
474 major QTLs. This MAGIC core set comprised individuals which were carefully selected based on  
475 genome-wide SNP diversity excluding sister lines and duplicates, so interference by kinship and  
476 population structure would not be a problem during association analysis. The population size of  
477 305 highly homozygous lines also provides sufficient internal replications of marker alleles needed  
478 for marker-trait association; at a parent-unique locus, approximately one-eighth of the population  
479 (~38 individuals or 12.5%) carry the parent-unique allele. The challenge for QTL detection in the  
480 MAGIC population, however, is a lack of donor-specific markers flanking the QTL in question,  
481 whose alleles cannot distinguish the QTL donor from other parents. In the case of the major  
482 photoperiod QTL, it was fortunate that favorable alleles in the region were specific to the non-  
483 photoperiod donors CB27 and IT82E-18 (Supplemental File S3). For other trait-associated SNPs  
484 with lower LOD scores, their true effect might be diluted by ‘hidden’ unfavorable alleles during  
485 GWAS analysis. Enriching such regions with more parent-unique markers would help improve the  
486 efficiency of QTL mapping.

487

#### 488 *Genetic improvement perspectives*

489 The strong transgressive segregation observed for agronomic traits provides opportunities for  
490 selecting MAGIC lines that outperform the parents. Selecting for large seed size, which is  
491 preferred by consumers in SSA, would be straightforward because the trait appeared highly  
492 heritable (Fig. 5b). In contrast, selecting for higher yield will be more difficult given its relatively  
493 low heritability (Fig. 5a); based on the pattern of variation in yield under restricted versus full  
494 irrigation, it may be more effective to select for high yield under drought stress in which at least  
495 11% of the RILs yielded better than the 8 MAGIC parents. These lines probably carry a

496 combination of different drought-tolerance genes contributed from multiple parents, because the  
497 parents are known to yield well under drought conditions in different African countries (Table 1).  
498 MAGIC lines that are not photoperiod sensitive could be grown widely across seasons and regions  
499 with different latitudes. Lines that flower early may escape damage by flower/pod feeding insects  
500 and abiotic stress such as heat and terminal drought in certain environments. Lines with  
501 exceptionally early or delayed crop senescence are suitable for production systems requiring single  
502 or double flushes of pods, respectively. Plants with acute erect growth could support heavy pod  
503 load, allow more leaf area to capture sunlight for photosynthesis, and support high plant population  
504 densities to increase yield under monocropping. Since the eight parents also vary in resistance to  
505 many major insects and diseases (Table 1), the MAGIC population will segregate for many biotic  
506 stress resistance traits and also contain lines with unique and novel combinations of defense genes.  
507 Therefore, phenotypic screening of the MAGIC population for those traits will enable genetic  
508 mapping and identification of lines carrying favorable trait combinations for selecting cultivars in  
509 target environments.

510 For the longer term, the cowpea MAGIC population can also benefit breeding programs by  
511 providing valuable pre-breeding resources. QTLs detected in the MAGIC population combined  
512 with existing knowledge of QTL regions and haplotypes can be applied to develop novel  
513 combinations of QTLs through intercrossing best MAGIC RILs, providing super trait-donor lines  
514 for use in breeding programs. QTLs for many key traits were already mapped in bi-parent and  
515 diversity populations where certain MAGIC parents were used in the crosses, such as seed size  
516 (LUCAS *et al.* 2013b), heat tolerance (LUCAS *et al.* 2013a), drought tolerance (MUCHERO *et al.*  
517 2013), resistance to foliar thrips (LUCAS *et al.* 2012), aphids (HUYNH *et al.* 2015), Fusarium wilt  
518 disease (POTTORFF *et al.* 2014), root-knot nematodes (HUYNH *et al.* 2016), ashy stem blight or  
519 charcoal rot disease caused by *Macrophomina phaseolina* (MUCHERO *et al.* 2011), viruses  
520 (OUÉDRAOGO *et al.* 2002a), the parasitic weed *Striga gesnerioides* (OUÉDRAOGO *et al.* 2012), and  
521 root architecture (BURRIDGE *et al.* 2017). It is therefore possible to track positive haplotypes  
522 contributed by different MAGIC parents in each MAGIC line and then intercross best lines to  
523 develop target ideotypes. The strategy would be similar to the multi-parent advanced generation  
524 recurrent selection (MAGReS) approach proposed recently by Huang *et al.* (2015), except that (1)  
525 prior knowledge of QTL information from cowpea bi-parental mapping will be utilized, (2) the  
526 MAGIC RILs selected for intercrosses are more advanced (F8), and (3) the selection can be  
527 targeted using both QTL haplotypes and predicted breeding values based on genome-background  
528 diversity. The resulting MAGReS lines will be fixed for positive haplotypes at known QTLs and  
529 carry additional recombinations in other unknown loci conferring high grain yield. They can thus  
530 be a valuable resource both for genetic improvement (as super trait donors or new cultivars) and  
531 for detecting novel QTLs when combined with the current MAGIC RIL set.

532

### 533 **Supplementary Materials**

534 Supplemental File S1: Illustration of recombinant identification

535 Supplemental File S2: Major QTL region associated with seed size

536 Supplemental File S3: Major QTL region associated with photoperiod sensitivity

537 Supplemental File S4: Genotypic and phenotypic data used in GWAS

538 Supplemental File S5: Genotypic and phenotypic data used in biparental mapping

539 **Acknowledgements**

540 This work was supported in large part by grants from the Generation Challenge Programme of the  
541 Consultative Group on International Agricultural Research to PAR, JDE and TJC, with additional  
542 support from the USAID Feed the Future Innovation Lab for Collaborative Research on Grain  
543 Legumes (Cooperative Agreement EDH-A-00-07-00005) to PAR and TJC, the USAID Feed the  
544 Future Innovation Lab for Climate Resilient Cowpea (Cooperative Agreement AID-OAA-A-13-  
545 00070) to TJC and PAR, and the NSF-BREAD (Advancing the Cowpea Genome for Food  
546 Security) to TJC, PAR, SL, MMA and BLH. The authors thank Tra Duong, Hyun Park Kang, Eric  
547 Castillo, Jasmine Gracin-Dixon, Uriah Dixon, Mitchell Lucas and Savannah St. Clair for technical  
548 assistance. The authors also thank Peggy Mauk, Vince Samons, and staff at UC Riverside  
549 Agricultural Operations and Coachella Valley Agricultural Research Station for managing field  
550 trials.

551

552

553 **References**

554

555 ANYIA, A., and H. HERZOG, 2004 Genotypic variability in drought performance and recovery in  
556 cowpea under controlled environment. *Journal of Agronomy and Crop Science* **190**: 151-  
557 159.

558 BANDILLO, N., C. RAGHAVAN, P. A. MUYCO, M. A. L. SEVILLA, I. T. LOBINA *et al.*, 2013 Multi-  
559 parent advanced generation inter-cross (MAGIC) populations in rice: progress and  
560 potential for genetics research and breeding. *Rice* **6**: 11.

561 BOWCOCK, A. M., A. RUIZLINARES, J. TOMFOHRDE, E. MINCH, J. R. KIDD *et al.*, 1994 High-  
562 resolution of human evolutionary trees with polymorphic microsatellites. *Nature* **368**: 455-  
563 457.

564 BRADBURY, P. J., Z. ZHANG, D. E. KROON, T. M. CASSTEVENS, Y. RAMDOSS *et al.*, 2007  
565 TASSEL: software for association mapping of complex traits in diverse samples.  
566 *Bioinformatics* **23**: 2633-2635.

567 BURRIDGE, J. D., H. M. SCHNEIDER, B.-L. HUYNH, P. A. ROBERTS, A. BUCKSCH *et al.*, 2017  
568 Genome-wide association mapping and agronomic impact of cowpea root architecture.  
569 *Theoretical and Applied Genetics* **130**: 419-431.

570 CAVANAGH, C., M. MORELL, I. MACKAY and W. POWELL, 2008 From mutations to MAGIC:  
571 resources for gene discovery, validation and delivery in crop plants. *Current Opinion in*  
572 *Plant Biology* **11**: 215-221.

573 DADSON, R., F. HASHEM, I. JAVAID, J. JOSHI, A. ALLEN *et al.*, 2005 Effect of water stress on the  
574 yield of cowpea (*Vigna unguiculata* L. Walp.) genotypes in the Delmarva region of the  
575 United States. *Journal of Agronomy and Crop Science* **191**: 210-217.

576 EHLERS, J. D., and A. E. HALL, 1997 Cowpea (*Vigna unguiculata* L. Walp.). *Field Crops*  
577 *Research* **53**: 187-204.



- 578 EHLERS, J. D., A. E. HALL, P. N. PATEL, P. A. ROBERTS and W. C. MATTHEWS, 2000  
579 Registration of ‘California Blackeye 27’ cowpea. *Crop Science* **40**: 854-855.
- 580 EWANSIHA, S., and B. SINGH, 2006 Relative drought tolerance of important herbaceous legumes  
581 and cereals in the moist and semi-arid regions of West Africa. *Journal of Food Agriculture*  
582 *and Environment* **4**: 188-190.
- 583 GRANTZ, D., and A. HALL, 1982 Earliness of an indeterminate crop, *Vigna unguiculata* (L.)  
584 Walp., as affected by drought, temperature, and plant density. *Crop and Pasture Science*  
585 **33**: 531-540.
- 586 GWATHMEY, C. O., and A. E. HALL, 1992 Adaptation to midseason drought of cowpea genotypes  
587 with contrasting senescence traits. *Crop science* **32**: 773-778.
- 588 HALL, A. E., N. CISSE, S. THIAW, H. O. A. ELAWAD, J. D. EHLERS *et al.*, 2003 Development of  
589 cowpea cultivars and germplasm by the Bean/Cowpea CRSP. *Field Crops Research* **82**:  
590 103-134.
- 591 HEY, J., and R. M. KLIMAN, 2002 Interactions between natural selection, recombination and gene  
592 density in the genes of *Drosophila*. *Genetics* **160**: 595-608.
- 593 HUANG, B. E., K. VERBYLA, A. VERBYLA, C. RAGHAVAN, V. SINGH *et al.*, 2015 MAGIC  
594 populations in crops: current status and future prospects. *Theoretical and Applied Genetics*  
595 **128**: 999-1017.
- 596 HUSSAIN, I. A., T. PRASAD, G. WRIGHT, M. U. KUMAR and R. N. RAO, 1999 Variation in  
597 transpiration efficiency and carbon isotope discrimination in cowpea. *Functional Plant*  
598 *Biology* **26**: 503-510.
- 599 HUYNH, B.-L., T. J. CLOSE, P. A. ROBERTS, Z. HU, S. WANAMAKER *et al.*, 2013a Gene pools and  
600 the genetic architecture of domesticated cowpea. *The Plant Genome* **6**: 1-8.
- 601 HUYNH, B.-L., J. D. EHLERS, T. J. CLOSE, N. CISSÉ, I. DRABO *et al.*, 2013b Enabling tools for  
602 modern breeding of cowpea for biotic stress resistance, pp. 183-199 in *Translational*  
603 *Genomics for Crop Breeding*. John Wiley & Sons Ltd.
- 604 HUYNH, B.-L., J. D. EHLERS, A. NDEVE, S. WANAMAKER, M. R. LUCAS *et al.*, 2015 Genetic  
605 mapping and legume synteny of aphid resistance in African cowpea (*Vigna unguiculata* L.  
606 Walp.) grown in California. *Molecular Breeding* **35**: 1-9.
- 607 HUYNH, B.-L., W. C. MATTHEWS, J. D. EHLERS, M. R. LUCAS, J. R. P. SANTOS *et al.*, 2016 A  
608 major QTL corresponding to the *Rk* locus for resistance to root-knot nematodes in cowpea  
609 (*Vigna unguiculata* L. Walp.). *Theoretical and Applied Genetics* **129**: 87-95.
- 610 KUDRE, T. G., S. BENJAKUL and H. KISHIMURA, 2013 Comparative study on chemical  
611 compositions and properties of protein isolates from mung bean, black bean and bambara  
612 groundnut. *Journal of the Science of Food and Agriculture* **93**: 2429-2436.

- 613 LONARDI, S., T. ZHU, M. MUÑOZ-AMATRIAIN, Q. LIANG, S. WANAMAKER *et al.*, 2017 Assembly  
614 of eleven pseudomolecules representing the cowpea genome sequence, pp. in *Plant and*  
615 *Animal Genome XXV, January 13 - 18, San Diego, CA, USA.*
- 616 LUCAS, M. R., J. D. EHLERS, B.-L. HUYNH, N.-N. DIOP, P. A. ROBERTS *et al.*, 2013a Markers for  
617 breeding heat-tolerant cowpea. *Molecular Breeding* **31**: 529–536.
- 618 LUCAS, M. R., J. D. EHLERS, P. A. ROBERTS and T. J. CLOSE, 2012 Markers for quantitative  
619 inheritance of resistance to foliar thrips in cowpea. *Crop Science* **52**: 2075-2081.
- 620 LUCAS, M. R., B.-L. HUYNH, P. D. S. VINHOLES, N. CISSE, I. DRABO *et al.*, 2013b Association  
621 studies and legume synteny reveal haplotypes determining seed size in *Vigna unguiculata*.  
622 *Frontiers in Plant Science* **4**.
- 623 MACKAY, I. J., P. BANSEPT-BASLER, T. BARBER, A. R. BENTLEY, J. COCKRAM *et al.*, 2014 An  
624 eight-parent multiparent advanced generation inter-cross population for winter-sown  
625 wheat: creation, properties, and validation. *G3: Genes|Genomes|Genetics* **4**: 1603-1610.
- 626 MAI-KODOMI, Y., B. SINGH, O. MYERS, J. YOPP, P. GIBSON *et al.*, 1999a Two mechanisms of  
627 drought tolerance in cowpea. *The Indian Journal of Genetics and Plant Breeding* **59**: 309-  
628 316.
- 629 MAI-KODOMI, Y., B. SINGH, T. TERAQ, O. MYERS, J. YOPP *et al.*, 1999b Inheritance of drought  
630 tolerance in cowpea. *The Indian Journal of Genetics and Plant Breeding* **59**: 317-323.
- 631 MATSUI, T., and B. SINGH, 2003 Root characteristics in cowpea related to drought tolerance at  
632 the seedling stage. *Experimental Agriculture* **39**: 29-38.
- 633 McVEAN, G. A. T., S. R. MYERS, S. HUNT, P. DELOUKAS, D. R. BENTLEY *et al.*, 2004 The Fine-  
634 Scale Structure of Recombination Rate Variation in the Human Genome. *Science* **304**:  
635 581-584.
- 636 MENG, L., H. LI, L. ZHANG and J. WANG, 2015 QTL IciMapping: Integrated software for genetic  
637 linkage map construction and quantitative trait locus mapping in biparental populations.  
638 *The Crop Journal* **3**: 269-283.
- 639 MUCHERO, W., N. N. DIOP, P. R. BHAT, R. D. FENTON, S. WANAMAKER *et al.*, 2009a A  
640 consensus genetic map of cowpea [*Vigna unguiculata* (L) Walp.] and synteny based on  
641 EST-derived SNPs. *Proceedings of the National Academy of Sciences USA* **106**: 18159-  
642 18164.
- 643 MUCHERO, W., J. D. EHLERS, T. J. CLOSE and P. A. ROBERTS, 2009b Mapping QTL for drought  
644 stress-induced premature senescence and maturity in cowpea [*Vigna unguiculata* (L.)  
645 Walp.]. *Theoretical and Applied Genetics* **118**: 849-863.
- 646 MUCHERO, W., J. D. EHLERS, T. J. CLOSE and P. A. ROBERTS, 2011 Genic SNP markers and  
647 legume synteny reveal candidate genes underlying QTL for *Macrophomina phaseolina*  
648 resistance and maturity in cowpea *Vigna unguiculata* (L) Walp. *BMC Genomics* **12**: 8.

- 649 MUCHERO, W., J. D. EHLERS and P. A. ROBERTS, 2010 QTL analysis for resistance to foliar  
650 damage caused by *Thrips tabaci* and *Frankliniella schultzei* (Thysanoptera: Thripidae)  
651 feeding in cowpea [*Vigna unguiculata* (L.) Walp.]. *Molecular Breeding* **25**: 47-56.
- 652 MUCHERO, W., P. A. ROBERTS, N. N. DIOP, I. DRABO, N. CISSE *et al.*, 2013 Genetic architecture  
653 of delayed senescence, biomass, and grain yield under drought stress in cowpea. *PLoS*  
654 *ONE* **8**: e70041.
- 655 MUÑOZ-AMATRIAIN, M., H. MIREBRAHIM, P. XU, S. I. WANAMAKER, M. LUO *et al.*, 2017  
656 Genome resources for climate-resilient cowpea, an essential crop for food security. *The*  
657 *Plant Journal* **89**: 1042-1054.
- 658 ODOEMENA, J., 2004 Water balance and proximate composition in cowpea (*Vigna unguiculata*  
659 (L.) Walps) seedlings exposed to drought and flooding stress. *Journal of Applied Sciences*  
660 *and Environmental Management* **8**: 55-57.
- 661 OGBONNAYA, C., B. SARR, C. BROU, O. DIOUF, N. DIOP *et al.*, 2003 Selection of cowpea  
662 genotypes in hydroponics, pots, and field for drought tolerance. *Crop Science* **43**: 1114-  
663 1120.
- 664 OUÉDRAOGO, J. T., B. S. GOWDA, M. JEAN, T. J. CLOSE, J. D. EHLERS *et al.*, 2002a An improved  
665 genetic linkage map for cowpea (*Vigna unguiculata* L.): Combining AFLP, RFLP, RAPD,  
666 biochemical markers, and biological resistance traits. *Genome* **45**: 175-188.
- 667 OUÉDRAOGO, J. T., M. OUÉDRAOGO, B. S. GOWDA and M. P. TIMKO, 2012 Development of  
668 sequence characterized amplified region (SCAR) markers linked to race-specific resistance  
669 to *Striga gesnerioides* in cowpea (*Vigna unguiculata* L.). *African Journal of Biotechnology*  
670 **11**: 12555-12562.
- 671 OUÉDRAOGO, J. T., J. B. TIGNEGRE, M. P. TIMKO and F. J. BELZILE, 2002b AFLP markers linked  
672 to resistance against *Striga gesnerioides* race 1 in cowpea (*Vigna unguiculata*). *Genome*  
673 **45**: 787-793.
- 674 PADI, F., 2004 Relationship between stress tolerance and grain yield stability in cowpea. *The*  
675 *Journal of Agricultural Science* **142**: 431-443.
- 676 PAYNE, R. W., S. A. HARDING, D. A. MURRAY, D. M. SOUTAR, D. B. BAIRD *et al.*, 2008  
677 GENSTAT release 11 reference manual. Parts 1, 2 and 3. VSN International: Hemel  
678 Hempstead, UK, pp.
- 679 POTTORFF, M. O., G. LI, J. D. EHLERS, T. J. CLOSE and P. A. ROBERTS, 2014 Genetic mapping,  
680 synteny, and physical location of two loci for *Fusarium oxysporum* f. sp. *tracheiphilum*  
681 race 4 resistance in cowpea [*Vigna unguiculata* (L.) Walp.]. *Molecular Breeding* **33**: 779-  
682 791.
- 683 POTTORFF, M. O., S. WANAMAKER, Y. Q. MA, J. D. EHLERS, P. A. ROBERTS *et al.*, 2012 Genetic  
684 and physical mapping of candidate genes for resistance to *Fusarium oxysporum* f.sp.  
685 *tracheiphilum* Race 3 in cowpea [*Vigna unguiculata* (L.) Walp.]. *PLoS ONE* **7**: e41600.

- 686 SEMAGN, K., R. BABU, S. HEARNE and M. OLSEN, 2014 Single nucleotide polymorphism  
687 genotyping using Kompetitive Allele Specific PCR (KASP): overview of the technology  
688 and its application in crop improvement. *Molecular Breeding* **33**: 1-14.
- 689 THIAW, S., A. HALL and D. PARKER, 1993 Varietal intercropping and the yields and stability of  
690 cowpea production in semiarid Senegal. *Field Crops Research* **33**: 217-233.
- 691 VAN BERLOO, R., 2008 GGT 2.0: Versatile software for visualization and analysis of genetic  
692 data. *Journal of Heredity* **99**: 232-236.
- 693 WANG, J., 2009 Inclusive composite interval mapping of quantitative trait genes. *Acta*  
694 *Agronomica Sinica* **35**: 239-245.
- 695 WATANABE, I., S. HAKOYAMA, T. TERAO and B. SINGH, 1997 Evaluation methods for drought  
696 tolerance of cowpea, pp. 141-146 in *Advances in Cowpea Research*, edited by B. B. SINGH,  
697 D. R. MOHAN RAJ, K. E. DASHIELL and L. E. N. JACKAI. Sayce Publishing, Devon, UK,  
698 Copublication of International Institute of Tropical Agriculture (IITA) and Japan  
699 International Research Center for Agricultural Sciences (JIRCAS).
- 700 WIDDERS, I. E., 2012 Cowpea: A solution to global challenges, pp. in *Innovative Research along*  
701 *the Cowpea Value Chain. Proceedings of the Fifth World Cowpea Conference on*  
702 *Improving Livelihoods in the Cowpea Value Chain through Advancement in Science, held*  
703 *in Saly, Senegal, 27 September - 1 October*, edited by O. BOUKAR, O. COULIBALY, C. A.  
704 FATOKUN, K. LOPEZ and M. TAMO. International Institute of Tropical Agriculture (IITA).
- 705
